# Supplementary material
Source: Research Square preprint supplement (doi:10.21203/rs.3.rs-10080809/v1)
Supplement: Supplementary file 1 [file 19567d15287f9263d8a53051.docx]

### **
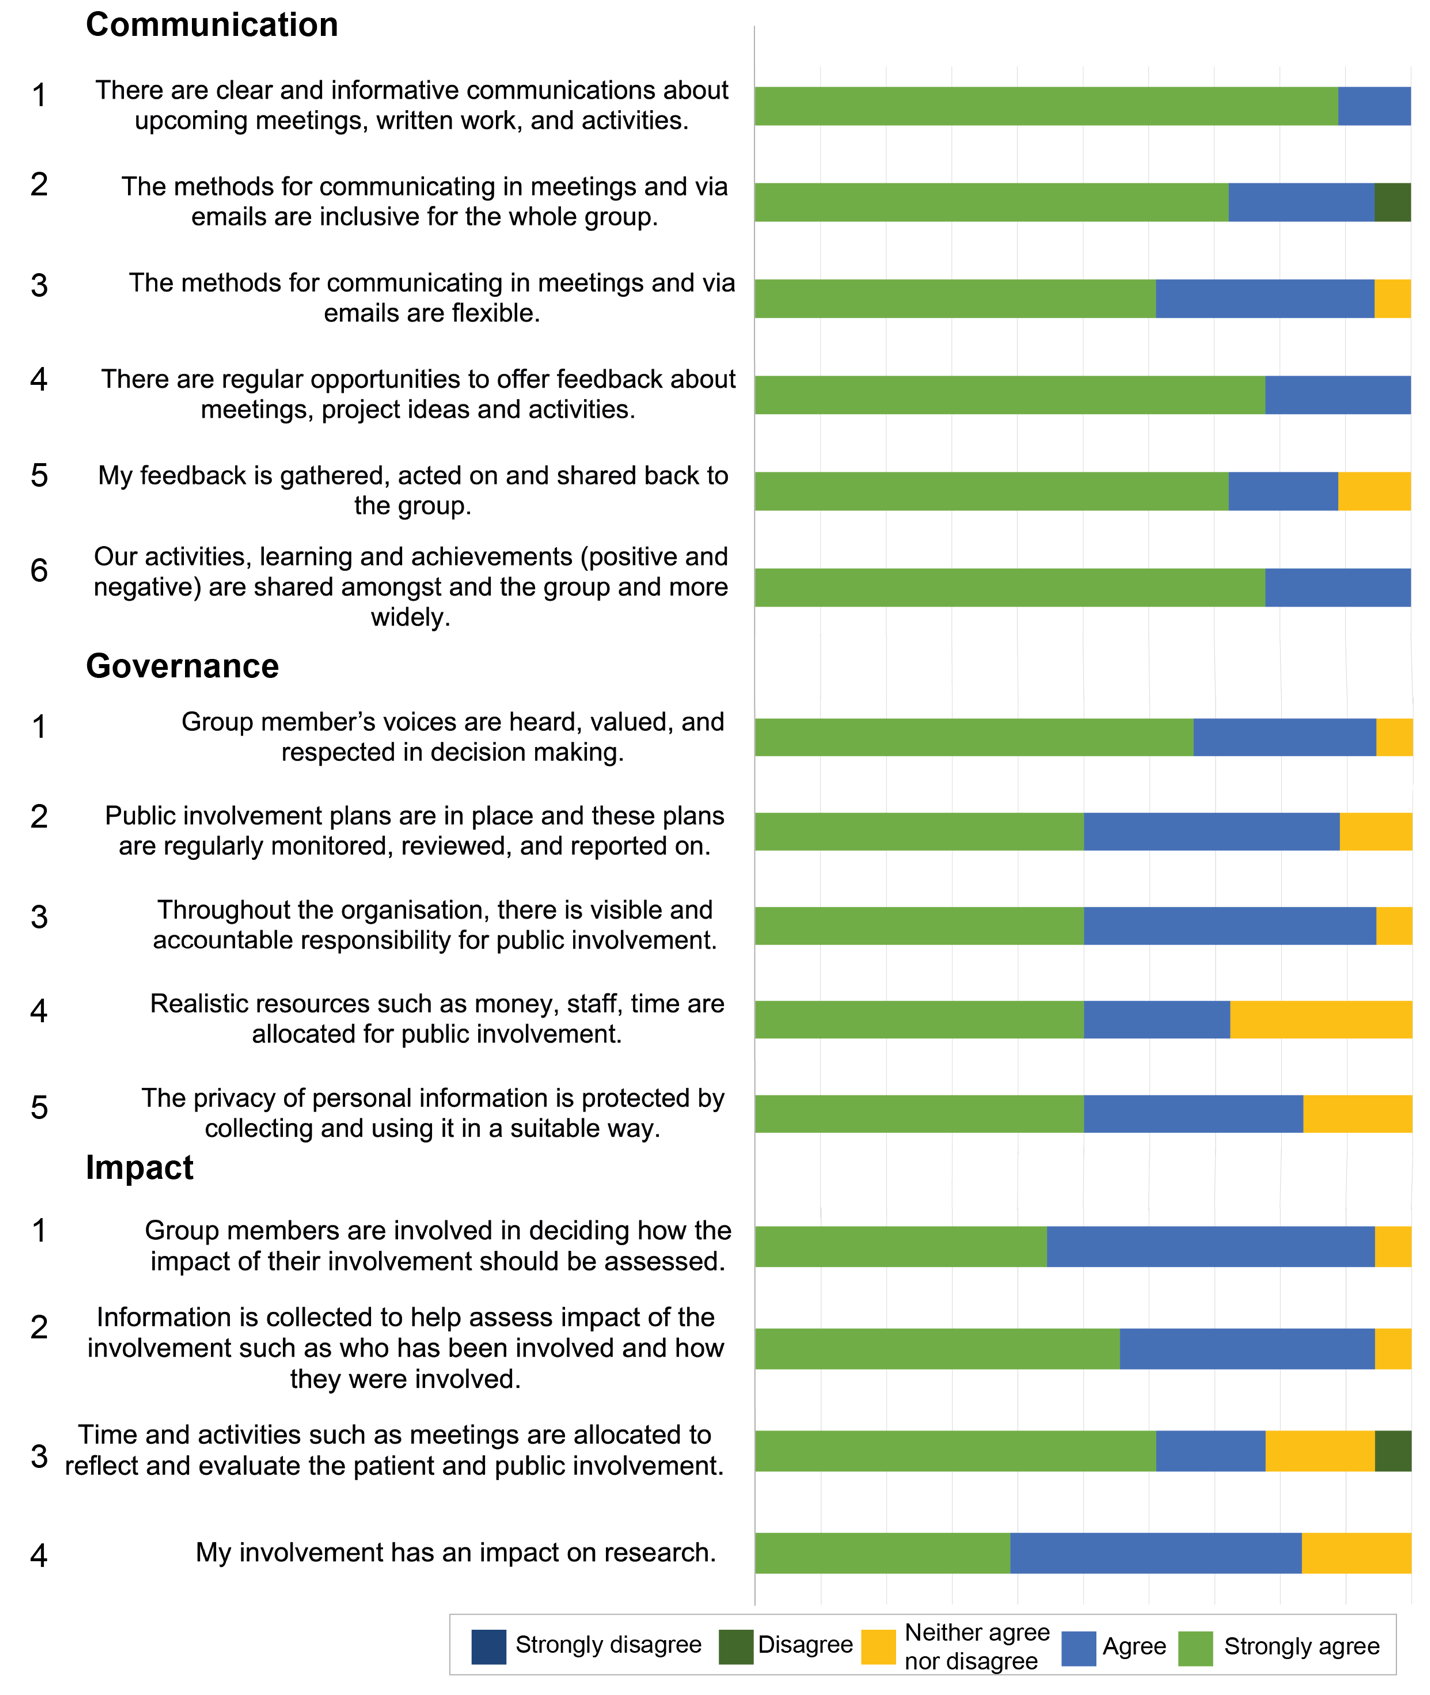
Additional file 5a.** Responses from rating scale questions in the group member’s questionnaire for the statements which align with the UK standards for public involvement – Communications, Governance and Impact. The number beside each statement aligns with the numbering used in figure 2 [main text].

***
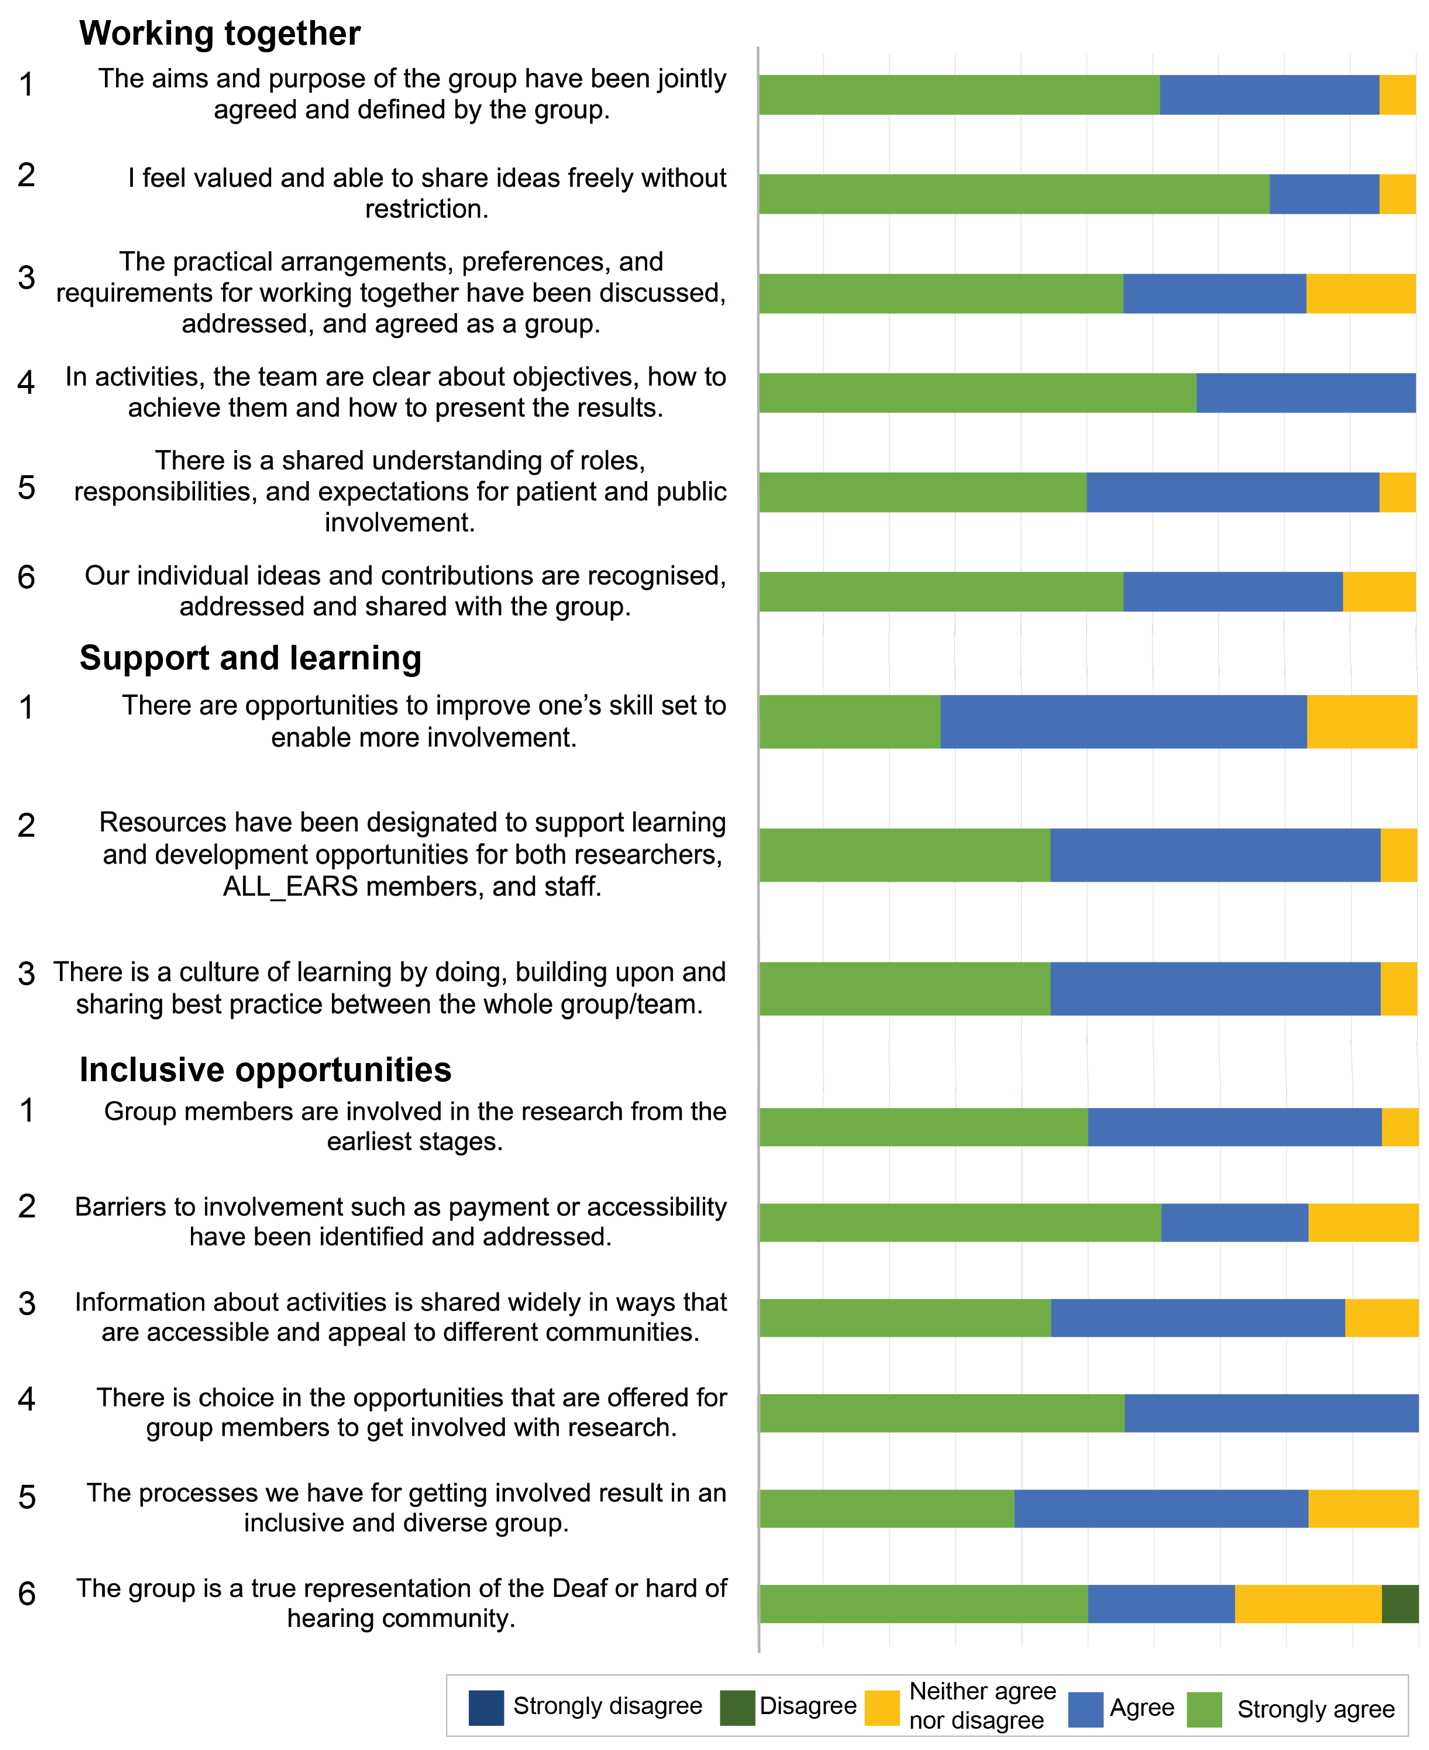
*Additional file 5b.** Responses from rating scale questions in the group member’s questionnaire for the statements which align with the UK standards for public involvement - Working together, Support and learning,


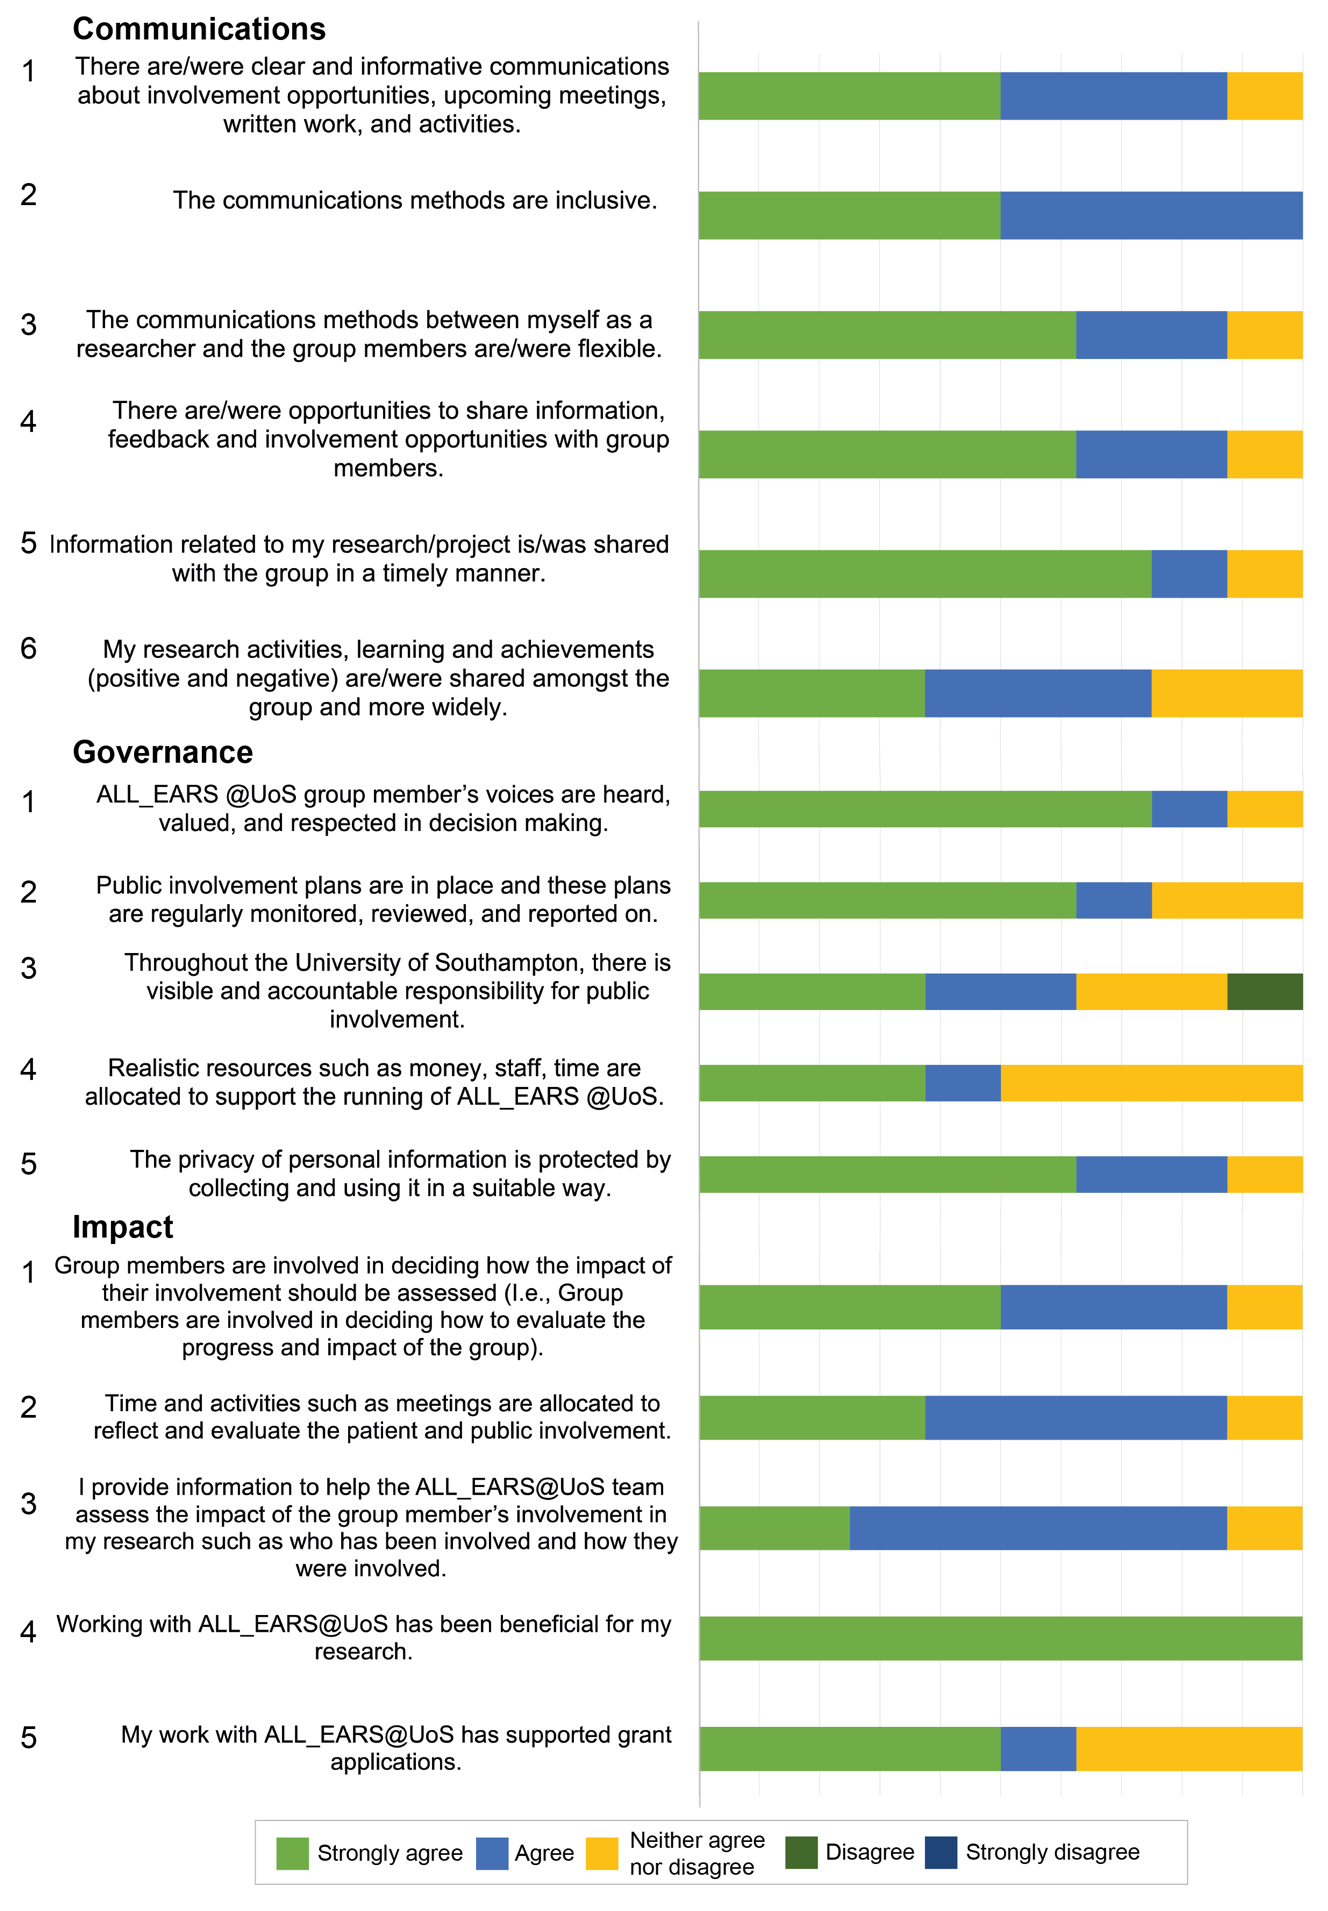


**Additional file 5c.** Responses from rating scale questions in the researcher’s questionnaire for the statements which align with the UK standards for public involvement – Communications, Governance and Impact. The number beside each statement aligns with the numbering used in figure 6 [main text].


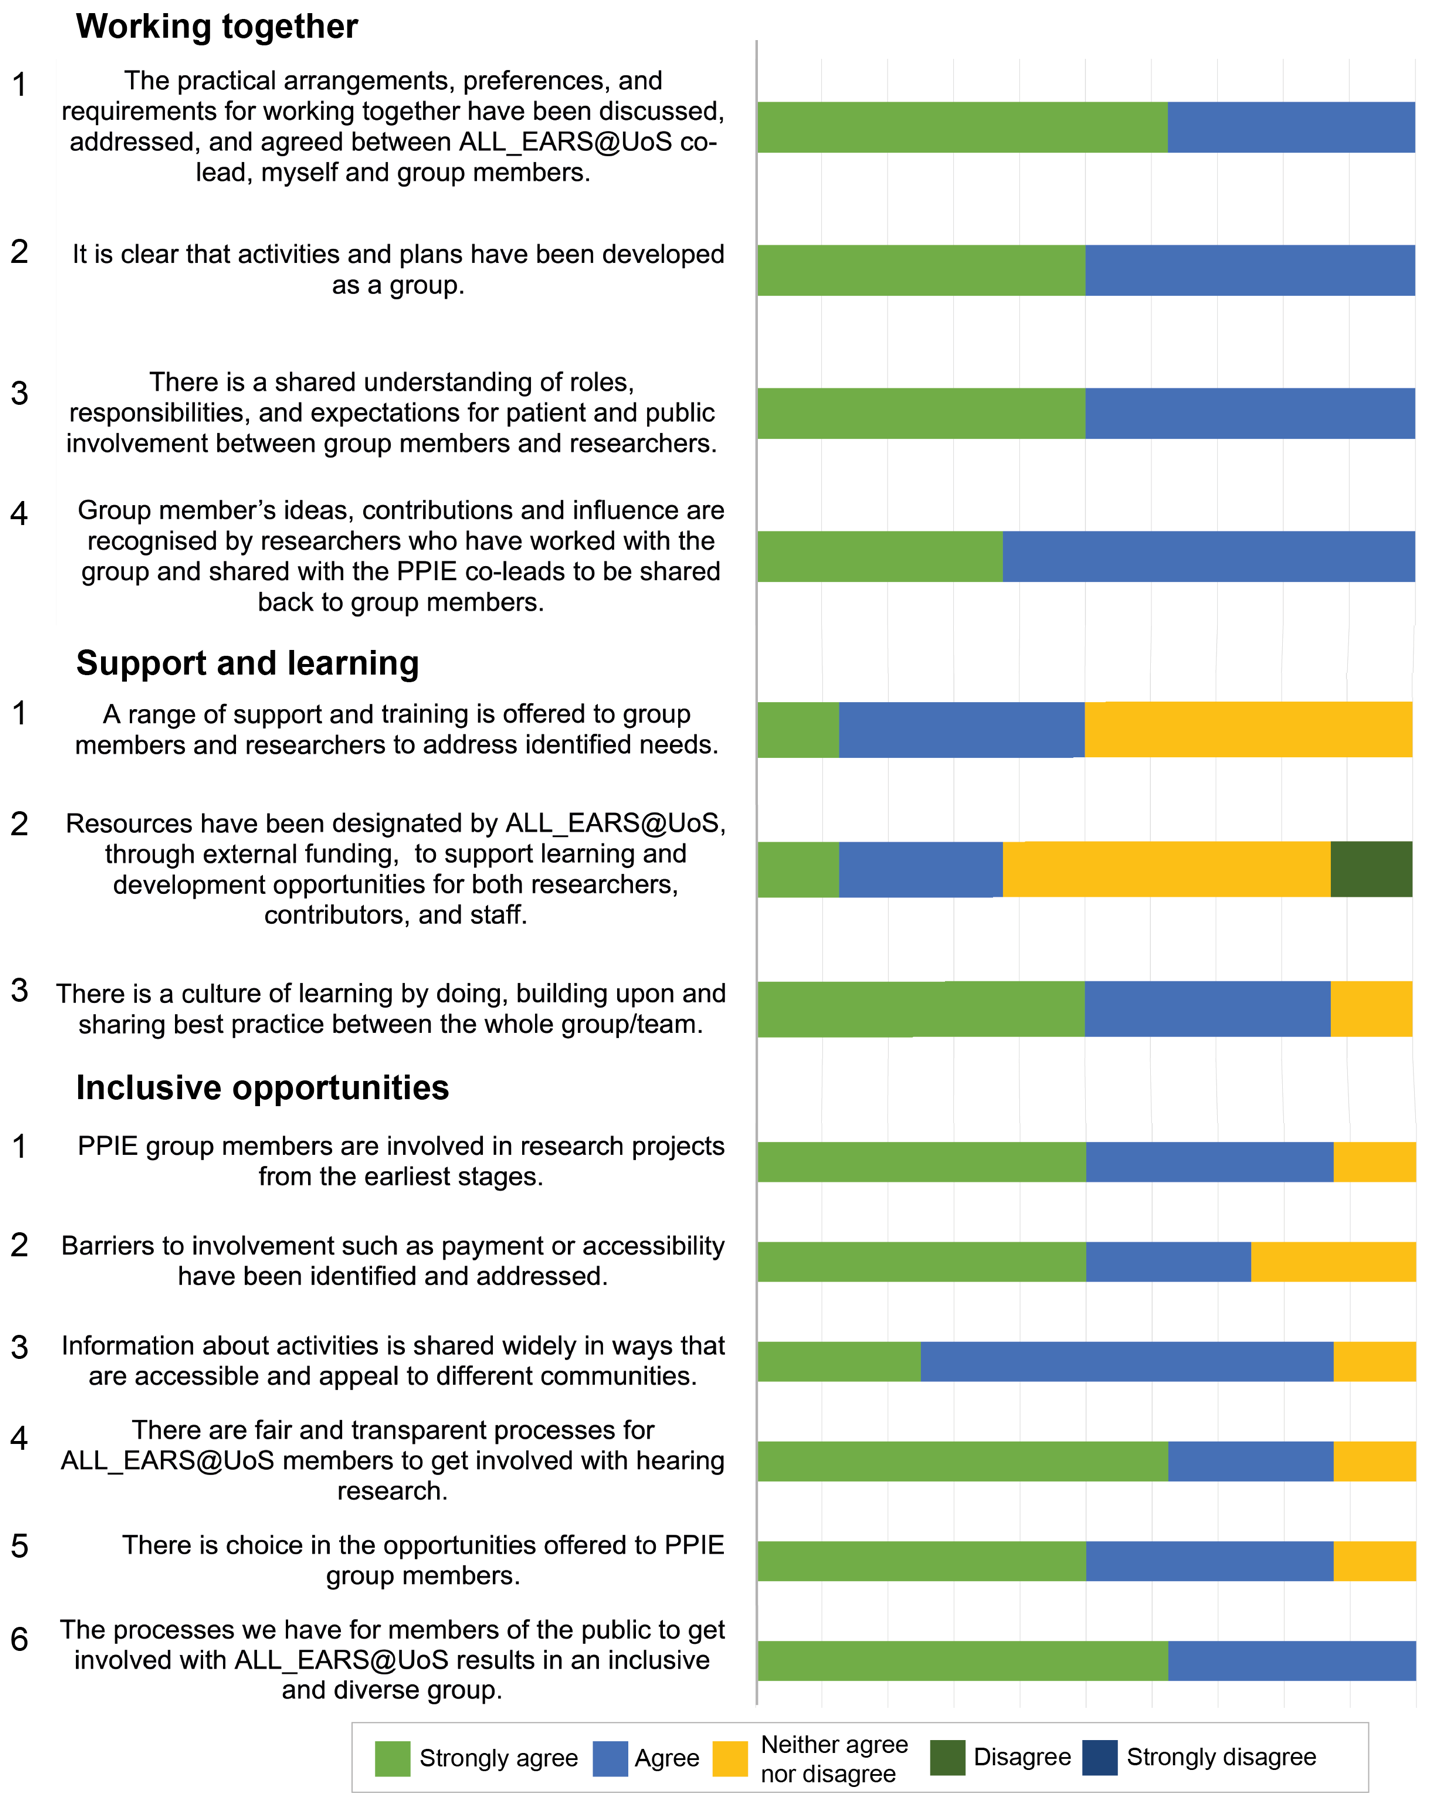


**Additional file 5d.** Responses from rating scale questions in the researcher’s questionnaire for the statements which align with the UK standards for public involvement - Working together, Support and learning, Inclusive opportunities. The number beside each statement aligns with the numbering used in figure 6 [main text].
