# Supplementary material
Source: Research Square preprint supplement (doi:10.21203/rs.3.rs-10080809/v1)
Supplement: Supplementary file 2 [file 2db01da048f890f0d06f63f9.docx]

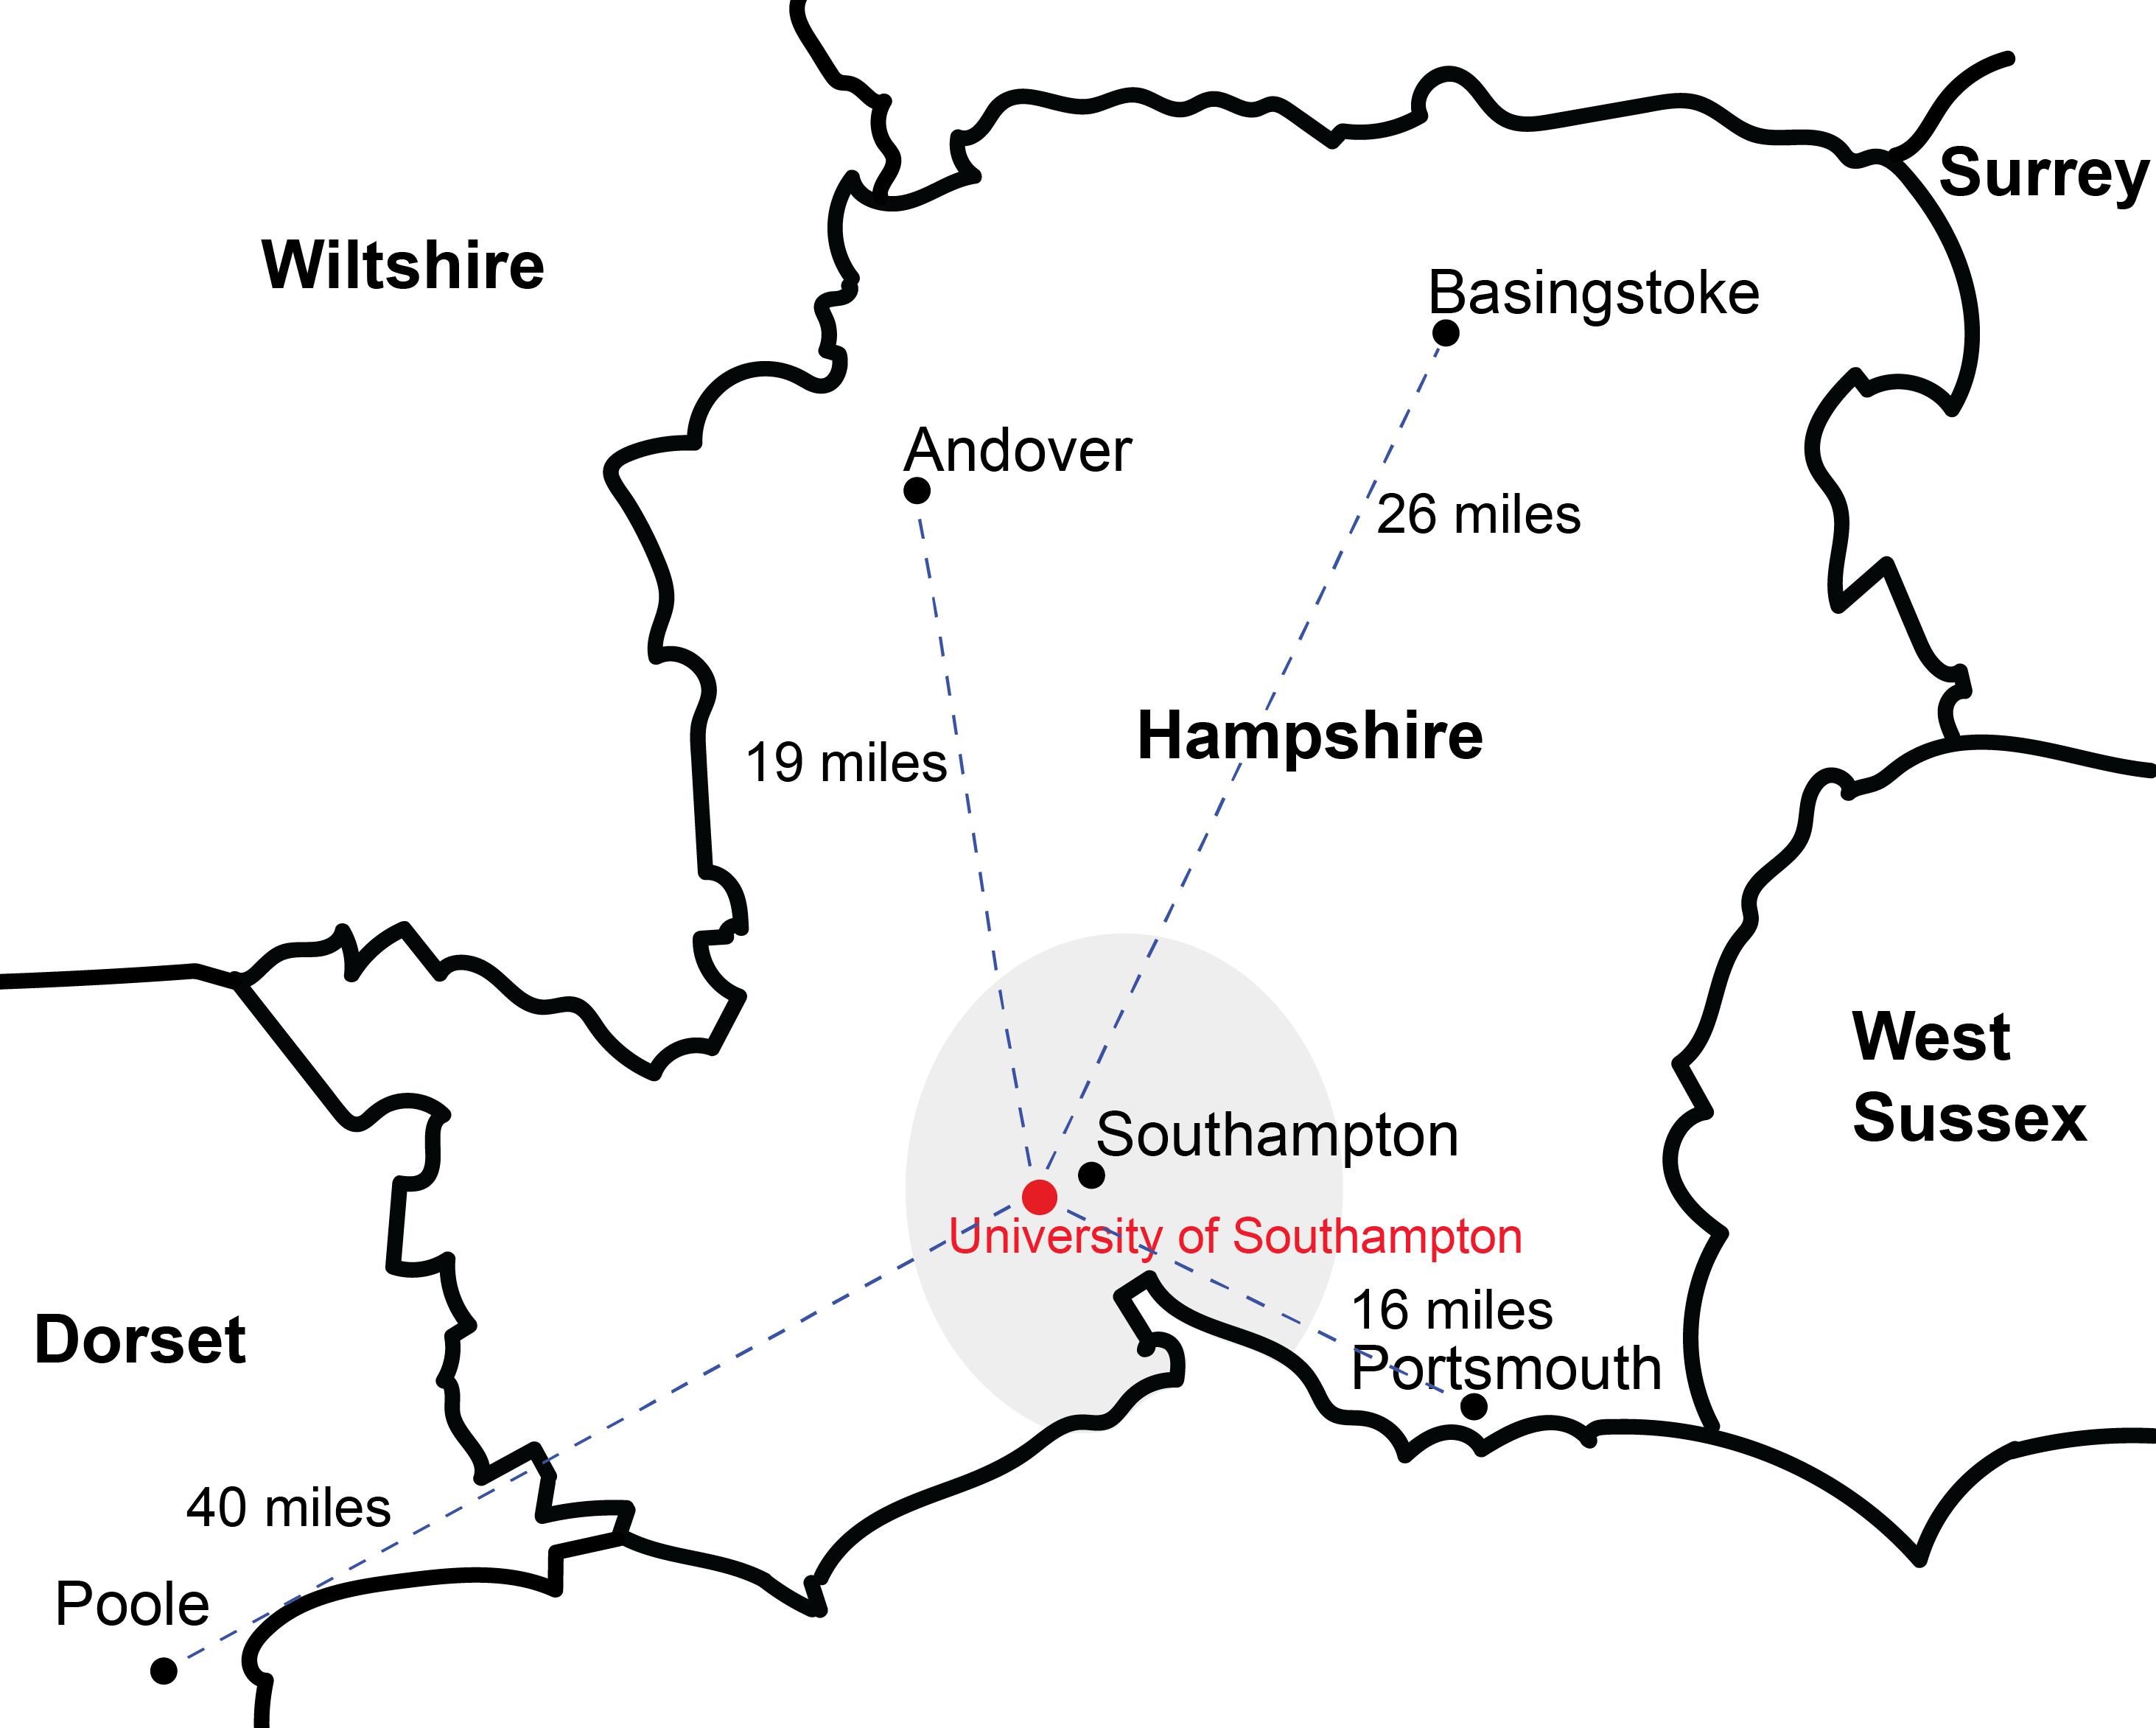


**Additional file 4.** A map showing the distance in miles from University of Southampton to the surrounding areas where group member respondents live. The grey area represents the city of Southampton where the majority of respondents live.
