# Supplementary material
Source: Research Square preprint supplement (doi:10.21203/rs.3.rs-10080809/v1)
Supplement: Supplementary file 4 [file 5fa49cfccf3f4ea3bf281071.docx]

**Additional file 7.** Gender of researcher respondents and the institution and faculty the researchers belong to.

| **Gender** | **Number** | **Percentage of researcher respondents (%)** |
| --- | --- | --- |
| Female | 7 | 88 |
| Male | 1 | 12 |
| **Institution** |  |  |
| University of Southampton | 7 | 88 |
| Univerisity of Cambridge | 1 | 12 |
| **Faculty** |  |  |
| Social Sciences | 1 | 12 |
| Faculty of Engineering and Physical Science | 1 | 12 |
| Faculty of Enviornmental and Life Sciences | 1 | 12 |
| Faculty of Medicine | 2 | 24 |
| Clinical Neurosciences | 1 | 12 |
| Auditory Implant Service | 1 | 12 |
| **Current position** |  |  |
| Postgraduate researcher | 0 | 0 |
| Postdoctoral researcher | 0 | 0 |
| Academic | 1 | 12 |
| Clinician | 2 | 24 |
| Academic and clinician | 3 | 36 |
| Undergraduate | 1 | 12 |
| Project manager | 1 | 12 |
